# Supplementary material for: Chloride-assisted synthesis of tellurene directly on SiO2/Si substrates: growth mechanism, thermal properties, and device applications
Source: Royal Society of Chemistry journal article supplement (doi:10.1039/d3ma00038a), 2023-01-01
Supplement: d3ma00038a1.pdf [file d3ma00038a1.pdf]

## Supporting Information

# Chlorides-assisted Synthesis of tellurene on arbitrary substrate: growth mechanism, thermal properties, and device applications

*Yi-Hsun Chan,<sup>a</sup> Che-Yi Lin,<sup>b</sup> Yu-Chang Chou,<sup>a</sup> Alice Chinghsuan Chang,<sup>g</sup> Yen-Fu Lin<sup>b, d, e, f</sup> and Yu-Ze Chen<sup>\*a, c</sup>*

<sup>a</sup>Department of Materials Science and Engineering, National Cheng Kung University, Tainan City 70101, Taiwan

<sup>b</sup>Department of Physics, National Chung Hsing University, Taichung, 40227, Taiwan

<sup>c</sup>Program on Key Materials, Academy of Innovative Semiconductor and Sustainable Manufacturing, National Cheng Kung University, Tainan City 70101, Taiwan

<sup>d</sup>Department of Materials Science and Engineering, National Chung Hsing University, Taichung, 40227, Taiwan

<sup>e</sup>Institute of Nanoscience, National Chung Hsing University, Taichung, 40227, Taiwan

<sup>f</sup>i-Center for Advanced Science and Technology (i-CAST), National Chung Hsing University, Taichung, 40227, Taiwan

<sup>g</sup>Center for measurement standards, Industrial technology research institute, Hsinchu, 30011, Taiwan

\*E-mail: yzchen@gs.ncku.edu.tw

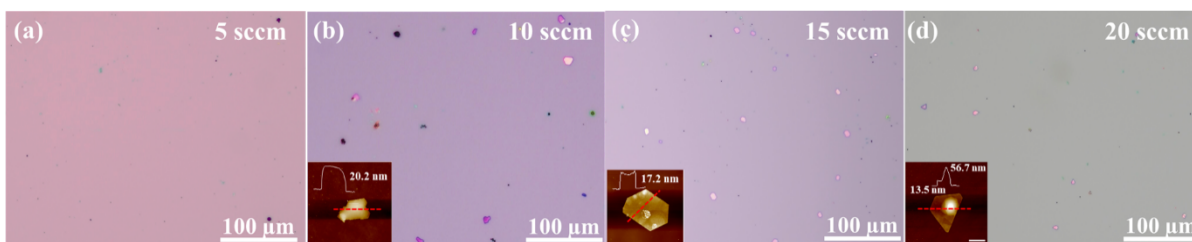

Figure S1 Tellurene flakes synthesized at 750 °C with the pure hydrogen of (a) 5 (b) 10 (c) 15 (d) 20 sccm.

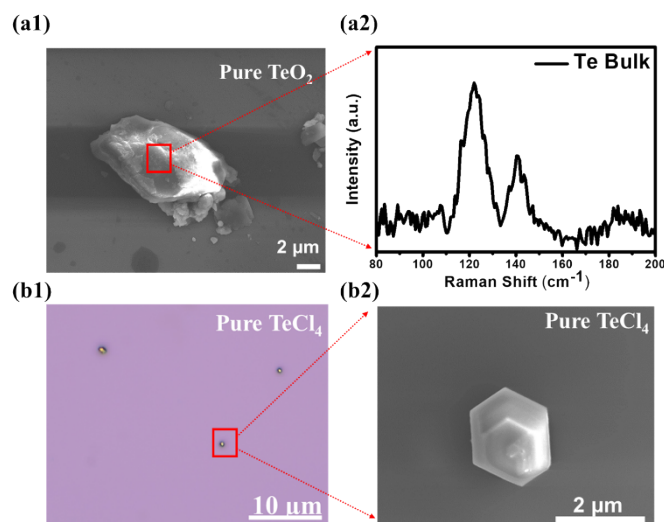

Figure S2 (a1) Formation of Te bulk by using solely  $\text{TeO}_2$  as precursors *via* CVD process. (a2) The corresponding Raman spectrum. (b1) Formation of Te nanowires by using solely  $\text{TeCl}_4$  as precursors *via* CVD process. (b2) Zoomed-in SEM image, observed the preferred orientation of growth along z-axis.

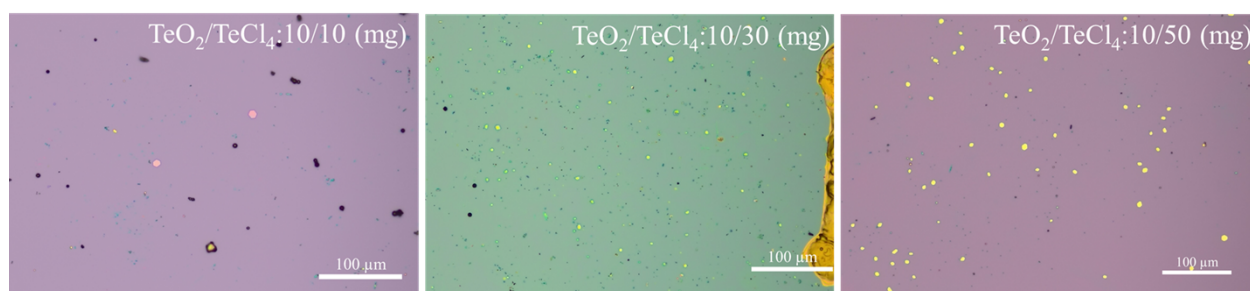

Figure S3 OM images of tellurene by controlling the ratio of  $\text{TeO}_2/\text{TeCl}_4$  with 10/10, 10/30 and 10/50 mg through reduction process.

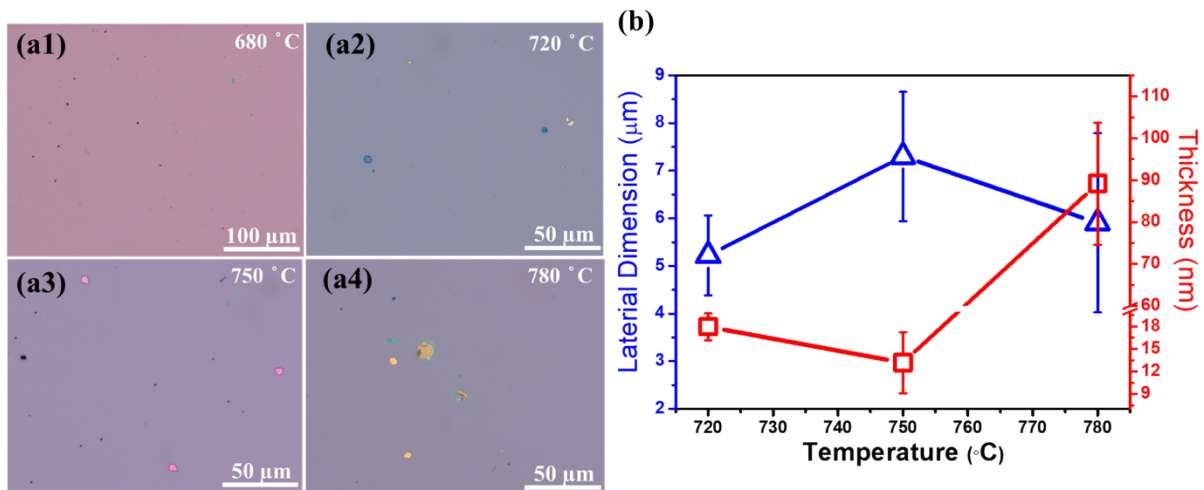

Figure S4 Tellurene flakes synthesized at (a1) 680 °C. (a2) 720 °C. (a3) 750 °C. (a4) 780 °C. (b) The dependance of lateral size and thickness with the varied temperature.

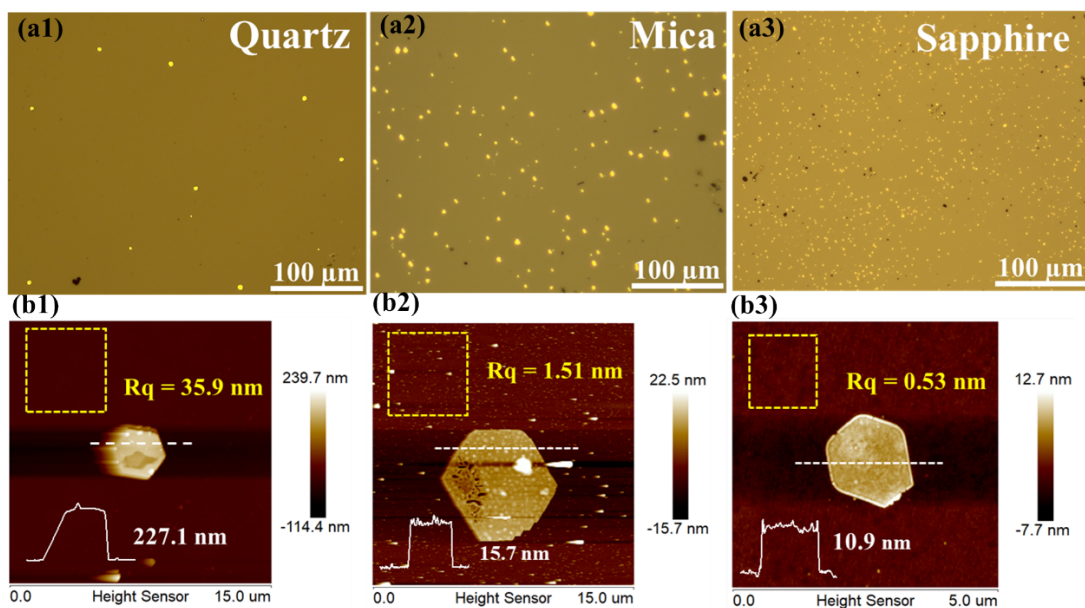

Figure S5 Synthesis of tellurene on (a1) Quartz. (a2) Mica. (a3) Sapphire. The corresponding AFM results of tellurene synthesized on (b1) Quartz. (b2) Mica. (b3) Sapphire.

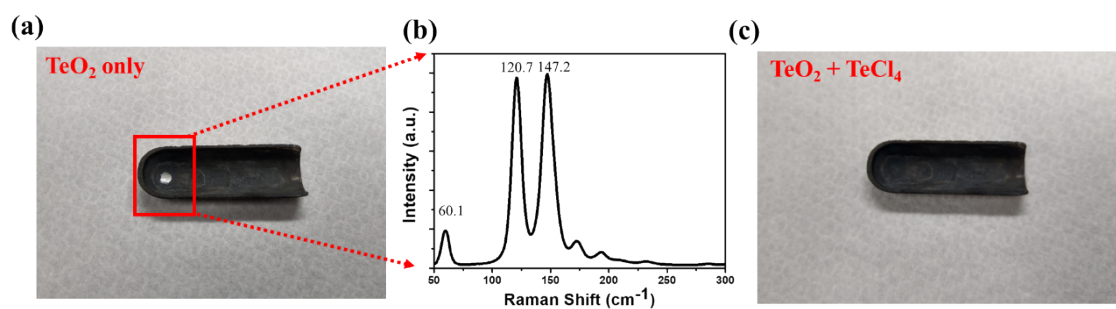

Figure S6 (a) Optical image of boat which initially placed only  $\text{TeO}_2$  after CVD process. (b) Corresponding Raman spectrum of residues after CVD process. (c) Optical image of the boat where initially placed the mixture of  $\text{TeO}_2$  and  $\text{TeCl}_4$  through CVD process.
